# Supplementary material
Source: PubMed Central journal article supplement (PMC4117225)
Supplement: supp_127.15.3199_JCS098343.pdf [file supp_127.15.3199_JCS098343.pdf]

**Table S1. Key ERM activities.**

| ERM activity                    | Description                                                                                                                        | Reference                    |
|---------------------------------|------------------------------------------------------------------------------------------------------------------------------------|------------------------------|
| B cell activation               | Ezrin facilitates B-cell receptor clustering in response to antigen                                                                | (Parameswaran & Gupta, 2013) |
| Immunological synapse formation | Ezrin and moesin are required for the formation and activation of the immunological synapse                                        | Parameswaran & Gupta, 2013)  |
| Leukocyte rolling               | ERM-association with the P-selectin glycoprotein PSGL regulates leukocyte rolling                                                  | (Spertini et al., 2012)      |
| Stereocilia                     | Radixin is required for the maintenance of stereocilia in mice                                                                     | (Kitajiri et al., 2004).     |
| Cilia membrane composition      | ERM proteins control the partitioning of membrane proteins in the ciliary membrane                                                 | (Francis et al., 2011).      |
| Parietal cell activation        | Ezrin is required for the formation and translocation of apical canalicular membranes in parietal cells                            | Tamura et al., 2005)         |
| Podocyte formation              | Moesin links podocalyxin to the actin cytoskeleton and is essential for the maintenance of the podocyte foot process in the kidney | (Fukasawa et al., 2011).     |
| RhoGTPase regulation            | <i>Drosophila</i> Moesin interacts with and regulates the RhoGAP Conundrum                                                         | (Neisch et al., 2013)        |
| Melanoma cell migration         | Ezrin is required for the formation of a uropod-like structure that guides amoeboid movement of melanoma cells                     | (Lorentzen et al., 2011)     |
| Cell division                   | ERM proteins are required for mitotic rounding and spindle integrity during cell division                                          | This review                  |
| Cortical asymmetry              | ERM proteins are required in many contexts for establishing cortical polarity                                                      | This review                  |
| Apical morphogenesis            | ERM proteins are essential drivers of apical morphogenesis                                                                         | This review                  |

## References

- Francis, S. S., Sfakianos, J., Lo, B. and Mellman, I.** (2011). A hierarchy of signals regulates entry of membrane proteins into the ciliary membrane domain in epithelial cells. *J. Cell Biol.* **193**, 219-233.
- Fukasawa, H., Obayashi, H., Schmieder, S., Lee, J., Ghosh, P. and Farquhar, M. G.** (2011). Phosphorylation of podocalyxin (Ser415) Prevents RhoA and ezrin activation and disrupts its interaction with the actin cytoskeleton. *Am. J. Pathol.* **179**, 2254-2265.
- Kitajiri, S., Fukumoto, K., Hata, M., Sasaki, H., Katsuno, T., Nakagawa, T., Ito, J., Tsukita, S. and Tsukita, S.** (2004). Radixin deficiency causes deafness associated with progressive degeneration of cochlear stereocilia. *J. Cell Biol.* **166**, 559-570.

- Lorentzen, A., Bamber, J., Sadok, A., Elson-Schwab, I. and Marshall, C. J.** (2011). An ezrin-rich, rigid uropod-like structure directs movement of amoeboid blebbing cells. *J. Cell Sci.* **124**, 1256-1267.
- Neisch, A. L., Formstecher, E. and Fehon, R. G.** (2013). Conundrum, an ARHGAP18 orthologue, regulates RhoA and proliferation through interactions with Moesin. *Mol. Biol. Cell* **24**, 1420-1433.
- Parameswaran, N. and Gupta, N.** (2013). Re-defining ERM function in lymphocyte activation and migration. *Immunol. Rev.* **256**, 63-79.
- Spertini, C., Baisse, B. and Spertini, O.** (2012). Ezrin-radixin-moesin-binding sequence of PSGL-1 glycoprotein regulates leukocyte rolling on selectins and activation of extracellular signal-regulated kinases. *J. Biol. Chem.* **287**, 10693-10702.
- Tamura, A., Kikuchi, S., Hata, M., Katsuno, T., Matsui, T., Hayashi, H., Suzuki, Y., Noda, T., Tsukita, S. and Tsukita, S.** (2005). Achlorhydria by ezrin knockdown: defects in the formation/expansion of apical canaliculi in gastric parietal cells. *J. Cell Biol.* **169**, 21-28.
